# Supplementary material for: Identification of ST3GAL5 as a prognostic biomarker correlating with CD8+ T cell exhaustion in clear cell renal cell carcinoma
Source: Front Immunol. 2022 Sep 12;13:979605. doi: 10.3389/fimmu.2022.979605 (PMC9510991; doi:10.3389/fimmu.2022.979605)
Supplement: Supplementary file 2 [file Table_1.xlsx]

## Sheet: Table S1
Table S1. The gene list for the exhausted T cell signature
No.	Gene symbol for the exhausted T cells signature
1	HAVCR2
2	PDCD1
3	ENTPD1
4	TNFRSF9
5	CCL3
6	PHLDA1
7	SIRPG
8	CTLA4
9	TIGIT
10	SNAP47
11	WARS
12	CD27
13	RGS1
14	TNFRSF1B
15	CD27-AS1
16	ACP5
17	AFAP1L2
18	MYO7A
19	AKAP5
20	ADGRG1
21	TOX
22	LAYN
23	CD38
24	ITGAE
25	RGS2
26	CCND2
27	FKBP1A
28	MTHFD1
29	GALM
30	CSF1
31	SNX9
32	ICOS
33	LYST
34	TPI1
35	SARDH
36	GZMB
37	CREM
38	HLA-DMA
39	PRDM1
40	PKM
41	MYO1E
42	FUT8
43	DUSP4
44	RAB27A
45	HLA-DRA
46	UBE2F-SCLY
47	IGFLR1
48	CXCL13
49	IFNG
50	UBE2F
51	ITM2A
52	ID3
53	CD2BP2
54	CHST12
55	CTSD
56	STAT3
57	BST2
58	CXCR6
59	RALGDS
60	VCAM1
61	TRAFD1
62	SYNGR2
63	VAPA
64	IFI35
65	CD63
66	NAB1
67	PARK7
68	MIR4632
69	YARS
70	PRKAR1A
71	IL2RB
72	DFNB31
73	HMGN3
74	MTHFD2
75	NDFIP2
76	PRF1
77	PRDX5
78	LAG3
79	MS4A6A
80	LINC00299

## Sheet: Table S2
Table S2. 645 genes co-expressed with ST3GAL5 identified by spearman's correlation analysis using cBioPortal online tool
Gene Symbol	Gene ID	Cytoband	Spearman's Correlation	p-Value	q-Value
AIM2	9447	1q23.1-q23.2	0.489375	1.66247e-33	3.32959e-29
RNF175	285533	4q31.3	0.482979	1.46997e-32	1.47203e-28
LPXN	9404	11q12.1	0.460785	1.99972e-29	9.36848e-26
TLR2	7097	4q31.3	0.460738	2.02907e-29	9.36848e-26
STAC3	246329	12q13.3	0.460285	2.33885e-29	9.36848e-26
PIM2	11040	Xp11.23	0.454559	1.379e-28	4.60311e-25
NOD2	64127	16q12.1	0.448534	8.60633e-28	2.46239e-24
RGS10	6001	10q26.11	0.447478	1.18181e-27	2.95865e-24
NFE2L3	9603	7p15.2	0.445661	2.03441e-27	4.52724e-24
TTLL6	284076	17q21.32	0.445303	2.26373e-27	4.5338e-24
EVI2A	2123	17q11.2	0.444885	2.56305e-27	4.66662e-24
NABP1	64859	2q32.3	0.438117	1.87432e-26	3.12824e-23
APOBEC3G	60489	22q13.1	0.436507	2.98938e-26	4.60549e-23
APOBEC3H	164668	22q13.1	0.434028	6.10309e-26	8.73091e-23
ARRB2	409	17p13.2	0.431865	1.13255e-25	1.45327e-22
NSMAF	8439	8q12.1	0.431706	1.18481e-25	1.45327e-22
STAT2	6773	12q13.3	0.431433	1.28059e-25	1.45327e-22
FYB1	2533	5p13.1	0.431154	1.38631e-25	1.45327e-22
LILRB4	11006	19q13.42	0.430855	1.50892e-25	1.45327e-22
TRPM2	7226	21q22.3	0.430834	1.51788e-25	1.45327e-22
MCOLN2	255231	1p22.3	0.430821	1.5238e-25	1.45327e-22
RAC2	5880	22q13.1	0.429954	1.94781e-25	1.77322e-22
EVI2B	2124	17q11.2	0.428951	2.5853e-25	2.25124e-22
SLC52A1	55065	17p13.2	0.426795	4.73817e-25	3.954e-22
PLEK	5341	2p14	0.424198	9.771e-25	7.82775e-22
BTK	695	Xq22.1	0.424021	1.02641e-24	7.90652e-22
LPAR5	57121	12p13.31	0.423291	1.2564e-24	9.31968e-22
NUP210	23225	3p25.1	0.422326	1.63991e-24	1.14271e-21
VAV1	7409	19p13.3	0.422245	1.67728e-24	1.14271e-21
FCGR1B	2210	1p11.2	0.422065	1.76266e-24	1.14271e-21
CEBPA	1050	19q13.11	0.422052	1.76872e-24	1.14271e-21
IFI30	10437	19p13.11	0.418932	4.15967e-24	2.60344e-21
LAIR1	3903	19q13.42	0.418776	4.34032e-24	2.63418e-21
CALHM6	441168	6q22.1	0.41823	5.03547e-24	2.96619e-21
CCSAP	126731	1q42.13	0.417597	5.98033e-24	3.42212e-21
ZNF804A	91752	2q32.1	0.415349	1.09844e-23	6.11097e-21
IGFLR1	79713	19q13.12	0.414744	1.29257e-23	6.99667e-21
GPR84	53831	12q13.13	0.414567	1.35576e-23	7.14556e-21
PLCXD2	257068	3q13.2	0.413105	2.00579e-23	1.03005e-20
CYRIB	51571	8q24.21	0.412993	2.06665e-23	1.03477e-20
SLAMF8	56833	1q23.2	0.412777	2.18943e-23	1.06117e-20
TICAM2	353376	5q22.3	0.412717	2.22533e-23	1.06117e-20
CARD11	84433	7p22.2	0.412153	2.58649e-23	1.2047e-20
FCGR1A	2209	1q21.2	0.411674	2.93805e-23	1.33735e-20
TAGAP	117289	6q25.3	0.411102	3.42102e-23	1.46679e-20
SP140	11262	2q37.1	0.411083	3.43824e-23	1.46679e-20
GBP5	115362	1p22.2	0.411079	3.44213e-23	1.46679e-20
EBI3	10148	19p13.3	0.410497	4.01678e-23	1.676e-20
SOWAHD	347454	Xq24	0.409596	5.097e-23	2.08332e-20
CTLA4	1493	2q33.2	0.409041	5.90194e-23	2.36408e-20
MICB	4277	6p21.33	0.408897	6.12973e-23	2.40718e-20
FCER1G	2207	1q23.3	0.408735	6.39819e-23	2.46429e-20
BIN2	51411	12q13.13	0.40861	6.61247e-23	2.49876e-20
PIK3AP1	118788	10q24.1	0.408478	6.84518e-23	2.5388e-20
ELAPOR1	57535	1p13.3	0.408352	7.07707e-23	2.57708e-20
MAN2B1	4125	19p13.13	0.407919	7.92912e-23	2.83579e-20
PTPN22	26191	1p13.2	0.407362	9.17893e-23	3.22519e-20
TLR6	10333	4p14	0.407172	9.6474e-23	3.33135e-20
CD72	971	9p13.3	0.407047	9.96785e-23	3.35991e-20
ADCY7	113	16q12.1	0.406924	1.02949e-22	3.35991e-20
CD86	942	3q13.33	0.406904	1.03492e-22	3.35991e-20
HLA-DPB2	3116	6p21.32	0.406823	1.05689e-22	3.35991e-20
FCHO1	23149	19p13.11	0.406711	1.08841e-22	3.40606e-20
SLAMF7	57823	1q23.3	0.405909	1.34219e-22	4.1356e-20
UCP2	7351	11q13.4	0.405541	1.47749e-22	4.4835e-20
LIMK1	3984	7q11.23	0.405183	1.62193e-22	4.84835e-20
IL27	246778	16p12.1-p11.2	0.403983	2.21531e-22	6.43018e-20
IL12RB1	3594	19p13.11	0.403364	2.60045e-22	7.44027e-20
PARVG	64098	22q13.31	0.402342	3.38611e-22	9.55169e-20
SASH3	54440	Xq26.1	0.401998	3.69911e-22	1.02897e-19
FMNL1	752	17q21.31	0.401795	3.89796e-22	1.06943e-19
CSTA	1475	3q21.1	0.401321	4.40368e-22	1.19185e-19
PTPN7	5778	1q32.1	0.400915	4.88672e-22	1.30495e-19
IL10RA	3587	11q23.3	0.400073	6.06309e-22	1.57703e-19
IL20RB	53833	3q22.3	0.399579	6.87957e-22	1.76646e-19
ZNF385A	25946	12q13.13	0.399393	7.2148e-22	1.82909e-19
CCR5	1234	3p21.31	0.398115	9.98892e-22	2.50073e-19
RNASE2	6036	14q11.2	0.397698	1.11065e-21	2.74618e-19
CYTH4	27128	22q13.1	0.397472	1.17617e-21	2.87271e-19
LAMP3	27074	3q27.1	0.396976	1.33357e-21	3.21791e-19
CD53	963	1p13.3	0.396209	1.61886e-21	3.85983e-19
PTPN6	5777	12p13.31	0.396123	1.65468e-21	3.89882e-19
TREM2	54209	6p21.1	0.396054	1.68344e-21	3.92046e-19
CD80	941	3q13.33	0.395758	1.81393e-21	4.17578e-19
IRF4	3662	6p25.3	0.395352	2.00945e-21	4.57334e-19
ANKRD22	118932	10q23.31	0.395151	2.11359e-21	4.75629e-19
NCKAP1L	3071	12q13.13-q13.2	0.395017	2.18623e-21	4.86508e-19
FCGR3A	2214	1q23.3	0.39467	2.38539e-21	5.24996e-19
IRF5	3663	7q32.1	0.394442	2.52587e-21	5.49872e-19
GPR65	8477	14q31.3	0.394309	2.61166e-21	5.5645e-19
CCR1	1230	3p21.31	0.394203	2.68197e-21	5.65416e-19
LAT	27040	16q13	0.394024	2.80521e-21	5.85238e-19
CD38	952	4p15.32	0.393674	3.06264e-21	6.32356e-19
PARP8	79668	5q11.1	0.39236	4.25168e-21	8.68905e-19
SPI1	6688	11p11.2	0.392122	4.5112e-21	9.12629e-19
CCL4	6351	17q12	0.391962	4.69439e-21	9.40192e-19
HTRA4	203100	8p11.22	0.391846	4.8318e-21	9.58131e-19
CXCR6	10663	3p21.31	0.391599	5.13811e-21	1.00157e-18
JAKMIP1	152789	4p16.1	0.391589	5.15086e-21	1.00157e-18
ADPGK	83440	15q24.1	0.391408	5.38777e-21	1.03756e-18
IL18	3606	11q23.1	0.39129	5.54806e-21	1.05825e-18
SNX20	124460	16q12.1	0.391077	5.84928e-21	1.10518e-18
APOBEC3D	140564	22q13.1	0.390875	6.1499e-21	1.14046e-18
FCGR1CP	100132417	1q21.1	0.390784	6.29037e-21	1.15581e-18
BASP1	10409	5p15.1	0.390449	6.83406e-21	1.2443e-18
APOC1	341	19q13.32	0.38993	7.77202e-21	1.40233e-18
IFNG	3458	12q15	0.389464	8.71865e-21	1.55908e-18
CLECL1	160365	12p13.31	0.389309	9.05966e-21	1.60572e-18
CASP1	834	11q22.3	0.388217	1.18531e-20	2.0824e-18
MILR1	284021	17q23.3	0.388164	1.20062e-20	2.09096e-18
RASSF5	83593	1q32.1	0.387283	1.49034e-20	2.57315e-18
PLA2G2D	26279	1p36.12	0.387074	1.56868e-20	2.68526e-18
STK17A	9263	7p13	0.386949	1.61726e-20	2.72585e-18
ARL11	115761	13q14.2	0.386943	1.61961e-20	2.72585e-18
BCL2A1	597	15q25.1	0.386385	1.85628e-20	3.07726e-18
POC5	134359	5q13.3	0.386379	1.85914e-20	3.07726e-18
SLC29A3	55315	10q22.1	0.386171	1.95588e-20	3.21086e-18
SH3BP1	23616	22q13.1	0.386084	1.99794e-20	3.25323e-18
ZBED2	79413	3q13.13	0.386009	2.03478e-20	3.28651e-18
AIF1	199	6p21.33	0.38591	2.08457e-20	3.33998e-18
CYLD	1540	16q12.1	0.385704	2.19167e-20	3.48371e-18
LAPTM5	7805	1p35.2	0.385464	2.32389e-20	3.6648e-18
OASL	8638	12q24.31	0.385314	2.40989e-20	3.77072e-18
GFI1	2672	1p22.1	0.385188	2.48517e-20	3.85838e-18
LAT2	7462	7q11.23	0.384799	2.73174e-20	4.20856e-18
RUFY4	285180	2q35	0.384756	2.75981e-20	4.21935e-18
ARHGAP9	64333	12q13.3	0.384313	3.07362e-20	4.66352e-18
CLEC4A	50856	12p13.31	0.384122	3.21888e-20	4.8472e-18
LINC00426	100188949	13q12.3	0.383829	3.4558e-20	5.16514e-18
CPNE7	27132	16q24.3	0.383793	3.4855e-20	5.17094e-18
APOC2	344	19q13.32	0.383649	3.60936e-20	5.31532e-18
M1AP	130951	2p13.1	0.383	4.22223e-20	6.08366e-18
LTA	4049	6p21.33	0.3825	4.76328e-20	6.81422e-18
MYBL1	4603	8q13.1	0.382433	4.84016e-20	6.87509e-18
TRAF3IP3	80342	1q32.2	0.38227	5.03436e-20	7.10057e-18
LHFPL2	10184	5q14.1	0.382152	5.17876e-20	7.25315e-18
BLOC1S2	282991	10q24.31	0.381014	6.80722e-20	9.40241e-18
HAMP	57817	19q13.12	0.380766	7.22375e-20	9.9094e-18
SIGLEC10	89790	19q13.41	0.380714	7.31488e-20	9.96615e-18
PMCH	5367	12q23.2	0.37975	9.2104e-20	1.24639e-17
SLC37A1	54020	21q22.3	0.379582	9.5867e-20	1.28861e-17
C1QB	713	1p36.12	0.379538	9.68831e-20	1.29358e-17
JSRP1	126306	19p13.3	0.379485	9.81028e-20	1.30119e-17
DOCK2	1794	5q35.1	0.379018	1.09654e-19	1.44484e-17
SAMSN1	64092	21q11.2	0.378934	1.11872e-19	1.46443e-17
SP110	3431	2q37.1	0.378766	1.16437e-19	1.51429e-17
ICOS	29851	2q33.2	0.3787	1.18261e-19	1.52808e-17
CTSC	1075	11q14.2	0.3786	1.21126e-19	1.55507e-17
MYO1F	4542	19p13.2	0.378442	1.25758e-19	1.60425e-17
DBF4	10926	7q21.12	0.378063	1.37599e-19	1.7442e-17
STK4	6789	20q13.12	0.377731	1.4887e-19	1.86348e-17
IKBKE	9641	1q32.1	0.377334	1.63524e-19	2.0342e-17
CSF3R	1441	1p34.3	0.377178	1.69664e-19	2.09056e-17
TNFSF13B	10673	13q33.3	0.377166	1.70143e-19	2.09056e-17
UBE2L6	9246	11q12.1	0.37613	2.17324e-19	2.65401e-17
CNEP1R1	255919	16q12.1	0.375289	2.64901e-19	3.21542e-17
RUBCNL	80183	13q14.13	0.375175	2.72054e-19	3.28234e-17
XCL1	6375	1q24.2	0.374836	2.94629e-19	3.5124e-17
PAK1	5058	11q13.5-q14.1	0.374604	3.11039e-19	3.68609e-17
HOXA1	3198	7p15.2	0.37447	3.20962e-19	3.78131e-17
NUB1	51667	7q36.1	0.374039	3.55046e-19	4.1584e-17
GRK3	157	22q12.1	0.37396	3.61686e-19	4.21153e-17
LAG3	3902	12p13.31	0.373609	3.9262e-19	4.49337e-17
EMBP1	647121	1p11.2	0.373318	4.20219e-19	4.7819e-17
ADAP2	55803	17q11.2	0.372818	4.72202e-19	5.34309e-17
GPR18	2841	13q32.3	0.372736	4.81356e-19	5.41606e-17
GMIP	51291	19p13.11	0.372669	4.88915e-19	5.45399e-17
CLEC7A	64581	12p13.2	0.372658	4.90173e-19	5.45399e-17
LY86	9450	6p25.1	0.37257	5.00331e-19	5.53626e-17
STAG3	10734	7q22.1	0.372505	5.07866e-19	5.58876e-17
TPRG1	285386	3q28	0.372341	5.27593e-19	5.77411e-17
FOXP3	50943	Xp11.23	0.372104	5.57559e-19	6.0689e-17
CRLF3	51379	17q11.2	0.371921	5.81765e-19	6.29815e-17
GM2A	2760	5q33.1	0.371664	6.17584e-19	6.64999e-17
SOAT1	6646	1q25.2	0.371163	6.93555e-19	7.42808e-17
CD37	951	19q13.33	0.370795	7.55243e-19	8.04575e-17
TIGIT	201633	3q13.31	0.370721	7.68323e-19	8.14179e-17
EMB	133418	5q11.1	0.370694	7.73015e-19	8.14839e-17
BUB1	699	2q13	0.370557	7.98059e-19	8.36834e-17
PCED1B	91523	12q13.11	0.370419	8.23902e-19	8.59433e-17
DNAJC5B	85479	8q13.1	0.370377	8.31899e-19	8.63278e-17
ADGRE1	2015	19p13.3-p13.2	0.370239	8.58781e-19	8.8658e-17
MS4A6A	64231	11q12.2	0.369839	9.41883e-19	9.59063e-17
IGSF6	10261	16p12.2	0.369832	9.43356e-19	9.59063e-17
OTULIN	90268	5p15.2	0.369795	9.51377e-19	9.62332e-17
SLA2	84174	20q11.23	0.369386	1.04534e-18	1.05206e-16
HACD4	401494	9p21.3	0.369335	1.05787e-18	1.05935e-16
STAT1	6772	2q32.2	0.369263	1.07557e-18	1.07091e-16
ITGAX	3687	16p11.2	0.369244	1.08011e-18	1.07091e-16
PIK3R5	23533	17p13.1	0.369209	1.08879e-18	1.0721e-16
WAS	7454	Xp11.23	0.369197	1.09202e-18	1.0721e-16
PTK2B	2185	8p21.2	0.368633	1.24311e-18	1.21448e-16
DEF6	50619	6p21.31	0.368517	1.27661e-18	1.24116e-16
ZBP1	81030	20q13.31	0.368438	1.29997e-18	1.25777e-16
PLCB2	5330	15q15.1	0.368122	1.39772e-18	1.33941e-16
SIGLEC9	27180	19q13.3-q13.4	0.367832	1.49367e-18	1.42454e-16
C1QC	714	1p36.12	0.367802	1.504e-18	1.42759e-16
IL2RG	3561	Xq13.1	0.367755	1.52021e-18	1.43617e-16
CD33	945	19q13.41	0.367549	1.59363e-18	1.49847e-16
TRIM36	55521	5q22.3	0.367503	1.6105e-18	1.50725e-16
TNFAIP8L2	79626	1q21.3	0.36747	1.62276e-18	1.51166e-16
PLAAT4	5920	11q12.3	0.366517	2.01682e-18	1.87004e-16
NCF1	653361	7q11.23	0.365944	2.29806e-18	2.11604e-16
CRTAM	56253	11q24.1	0.365934	2.30326e-18	2.11604e-16
SIRPG	55423	20p13	0.365699	2.42946e-18	2.22179e-16
CPOX	1371	3q11.2	0.365307	2.65609e-18	2.40707e-16
TLR10	81793	4p14	0.365012	2.83967e-18	2.56185e-16
SELPLG	6404	12q24.11	0.364732	3.02595e-18	2.71765e-16
ME2	4200	18q21.2	0.364483	3.20109e-18	2.86212e-16
NPY4R	5540	10q11.22	0.364456	3.22044e-18	2.86662e-16
CYTIP	9595	2q24.1	0.364141	3.45864e-18	3.06502e-16
SLC15A3	51296	11q12.2	0.363897	3.65456e-18	3.22438e-16
BCL11B	64919	14q32.2	0.363721	3.80225e-18	3.33998e-16
CORO1A	11151	16p11.2	0.363642	3.87068e-18	3.38524e-16
CD68	968	17p13.1	0.363182	4.29376e-18	3.73893e-16
IKZF1	10320	7p12.2	0.362968	4.50639e-18	3.9071e-16
CSF2RA	1438	Xp22.32 and Yp11.3	0.362913	4.56172e-18	3.93802e-16
MCF2L2	23101	3q27.1	0.36289	4.58546e-18	3.94153e-16
PCED1B-AS1	100233209	12q13.11	0.362511	4.99384e-18	4.27421e-16
LCP1	3936	13q14.13	0.362421	5.09548e-18	4.34265e-16
CD300LF	146722	17q25.1	0.362361	5.16523e-18	4.38344e-16
CTSS	1520	1q21.3	0.362094	5.48371e-18	4.63408e-16
C1ORF162	128346	1p13.2	0.361882	5.75147e-18	4.83994e-16
MAP4K1	11184	19q13.2	0.361735	5.94306e-18	4.97077e-16
MFSD2A	84879	1p34.2	0.361725	5.95658e-18	4.97077e-16
CD2	914	1p13.1	0.361602	6.12351e-18	5.08887e-16
PILRA	29992	7q22.1	0.361551	6.19439e-18	5.1265e-16
HCK	3055	20q11.21	0.361441	6.34843e-18	5.21091e-16
CDC25B	994	20p13	0.360961	7.06775e-18	5.75418e-16
IGF2BP3	10643	7p15.3	0.360493	7.84628e-18	6.33885e-16
SIGLEC8	27181	19q13.33-q13.41	0.360491	7.84918e-18	6.33885e-16
SCIMP	388325	17p13.2	0.360443	7.93368e-18	6.38135e-16
TASL	80231	Xp21.2	0.360379	8.04828e-18	6.44763e-16
LACTB	114294	15q22.2	0.360325	8.14635e-18	6.5002e-16
RIPK2	8767	8q21.3	0.360146	8.47778e-18	6.73782e-16
TBXAS1	6916	7q34	0.360104	8.55646e-18	6.7468e-16
CD69	969	12p13.31	0.360078	8.60769e-18	6.76058e-16
GPR45	11250	2q12.1	0.359903	8.949e-18	7.00119e-16
ZMYND15	84225	17p13.2	0.359624	9.52197e-18	7.42047e-16
ATF7IP2	80063	16p13.2-p13.13	0.359501	9.78637e-18	7.57683e-16
HPS3	84343	3q24	0.359496	9.79827e-18	7.57683e-16
CD96	10225	3q13.13-q13.2	0.359179	1.05114e-17	8.09705e-16
CXCL13	10563	4q21.1	0.359062	1.07881e-17	8.24668e-16
LRP8	7804	1p32.3	0.358919	1.11379e-17	8.48173e-16
SAT1	6303	Xp22.11	0.358801	1.1433e-17	8.67352e-16
NFAM1	150372	22q13.2	0.358551	1.20845e-17	9.13317e-16
DOK3	79930	5q35.3	0.358526	1.2151e-17	9.14886e-16
ARHGAP30	257106	1q23.3	0.358425	1.24251e-17	9.32025e-16
ANKRD36BP2	645784	2p11.2	0.358181	1.31157e-17	9.80155e-16
POU2F2	5452	19q13.2	0.35808	1.3413e-17	9.98647e-16
TRAFD1	10906	12q24.13	0.35795	1.38036e-17	1.02392e-15
TBC1D31	93594	8q24.13	0.357754	1.44157e-17	1.06538e-15
FAM78B	149297	1q24.1	0.357554	1.50656e-17	1.10932e-15
EPHB2	2048	1p36.12	0.357521	1.51756e-17	1.11332e-15
GSDME	1687	7p15.3	0.357437	1.54597e-17	1.13002e-15
TYROBP	7305	19q13.12	0.357295	1.59507e-17	1.16168e-15
C1QA	712	1p36.12	0.357106	1.66307e-17	1.20681e-15
LY96	23643	8q21.11	0.356825	1.76938e-17	1.27471e-15
CCL25	6370	19p13.2	0.356566	1.87298e-17	1.34452e-15
RHOH	399	4p14	0.356358	1.96069e-17	1.39746e-15
CARD9	64170	9q34.3	0.356139	2.05738e-17	1.46118e-15
APOBEC3C	27350	22q13.1	0.355707	2.2625e-17	1.60118e-15
LILRB1	10859	19q13.42	0.355629	2.30148e-17	1.62303e-15
CCR8	1237	3p22.1	0.35533	2.45711e-17	1.7267e-15
SH2D2A	9047	1q23.1	0.355044	2.61591e-17	1.83187e-15
XCL2	6846	1q24.2	0.354815	2.75015e-17	1.91916e-15
ABHD3	171586	18q11.2	0.354779	2.77206e-17	1.92773e-15
SUSD3	203328	9q22.31	0.354653	2.8493e-17	1.9746e-15
IL15	3600	4q31.21	0.354611	2.87556e-17	1.98592e-15
TMEM86A	144110	11p15.1	0.354143	3.18507e-17	2.19212e-15
C1S	716	12p13.31	0.354085	3.22607e-17	2.20119e-15
RGS19	10287	20q13.33	0.354084	3.22685e-17	2.20119e-15
MACROH2A1	9555	5q31.1	0.354077	3.23123e-17	2.20119e-15
CHST11	50515	12q23.3	0.353976	3.3031e-17	2.23625e-15
HLA-DMB	3109	6p21.32	0.353974	3.30503e-17	2.23625e-15
GTSF1	121355	12q13.13	0.353734	3.48242e-17	2.34835e-15
DUSP2	1844	2q11.2	0.353592	3.59174e-17	2.41394e-15
UNC13D	201294	17q25.3	0.353	4.08533e-17	2.73649e-15
ASCL2	430	11p15.5	0.352927	4.15075e-17	2.77104e-15
PPM1M	132160	3p21.2	0.35289	4.18407e-17	2.784e-15
FASLG	356	1q24.3	0.352491	4.56274e-17	3.02591e-15
CCDC88B	283234	11q13.1	0.352438	4.61573e-17	3.05095e-15
HLA-DOB	3112	6p21.32	0.352159	4.90325e-17	3.23034e-15
TNIP3	79931	4q27	0.351045	6.23795e-17	4.05629e-15
APOE	348	19q13.32	0.351011	6.28412e-17	4.07308e-15
TNFSF14	8740	19p13.3	0.350839	6.52107e-17	4.21303e-15
PPHLN1	51535	12q12	0.350784	6.59946e-17	4.24997e-15
CLEC2D	29121	12p13.31	0.350658	6.78069e-17	4.35268e-15
CD82	3732	11p11.2	0.350517	6.99097e-17	4.47333e-15
RGS1	5996	1q31.2	0.35043	7.12317e-17	4.54341e-15
ITGB7	3695	12q13.13	0.350326	7.28373e-17	4.63107e-15
UBASH3A	53347	21q22.3	0.350021	7.77675e-17	4.91333e-15
NAGK	55577	2p13.3	0.349994	7.82357e-17	4.92737e-15
TRAT1	50852	3q13.13	0.349605	8.50548e-17	5.3253e-15
HCAR2	338442	12q24.31	0.349479	8.73798e-17	5.45185e-15
CD27	939	12p13.31	0.349163	9.35064e-17	5.81598e-15
MTFR2	113115	6q23.3	0.349072	9.53543e-17	5.91256e-15
BORA	79866	13q21.33	0.348853	9.99226e-17	6.15769e-15
RAP2C	57826	Xq26.2	0.348313	1.12162e-16	6.86968e-15
GPR174	84636	Xq21.1	0.347831	1.24308e-16	7.59037e-15
BTLA	151888	3q13.2	0.34741	1.35989e-16	8.27836e-15
C3AR1	719	12p13.31	0.347337	1.38126e-16	8.383e-15
ITGB2	3689	21q22.3	0.347258	1.40468e-16	8.49937e-15
CR1L	1379	1q32.2	0.346782	1.55425e-16	9.34791e-15
CASP8	841	2q33.1	0.346514	1.64537e-16	9.77846e-15
ITGAL	3683	16p11.2	0.346483	1.65618e-16	9.78809e-15
BATF	10538	14q24.3	0.346467	1.66165e-16	9.78809e-15
GNA15	2769	19p13.3	0.345968	1.84707e-16	1.08484e-14
KCNAB2	8514	1p36.31	0.345576	2.00722e-16	1.17203e-14
PTPRH	5794	19q13.42	0.345488	2.04501e-16	1.19063e-14
RAET1K	646024	6q25.1	0.345084	2.22701e-16	1.29283e-14
FUT8	2530	14q23.3	0.344939	2.29628e-16	1.32919e-14
SLAMF1	6504	1q23.3	0.34464	2.44593e-16	1.41173e-14
DEPDC1B	55789	5q12.1	0.344585	2.47421e-16	1.42395e-14
ZNF18	7566	17p12	0.344469	2.53567e-16	1.45514e-14
FERMT3	83706	11q13.1	0.344244	2.65862e-16	1.51782e-14
RARRES1	5918	3q25.32	0.344242	2.66012e-16	1.51782e-14
CENPE	1062	4q24	0.344226	2.6687e-16	1.51782e-14
CD48	962	1q23.3	0.344215	2.67522e-16	1.51782e-14
PTPRC	5788	1q31.3-q32.1	0.343919	2.84692e-16	1.60614e-14
JAKMIP2	9832	5q32	0.343684	2.99121e-16	1.68281e-14
HSPBAP1	79663	3q21.1	0.343178	3.32649e-16	1.86412e-14
PRR13	54458	12q13.13	0.34317	3.33211e-16	1.86412e-14
LINC02694	400359	15q14	0.343092	3.38688e-16	1.88948e-14
RHNO1	83695	12p13.33	0.342743	3.64388e-16	2.01601e-14
ARHGAP22	58504	10q11.22-q11.23	0.342682	3.69103e-16	2.03647e-14
SH2D1A	4068	Xq25	0.342466	3.86136e-16	2.11878e-14
XPO6	23214	16p12.1	0.342268	4.02453e-16	2.19443e-14
CAPG	822	2p11.2	0.342261	4.03097e-16	2.19443e-14
PDE4DIP	9659	1q21.2	0.342259	4.0321e-16	2.19443e-14
MEI1	150365	22q13.2	0.342054	4.20914e-16	2.28457e-14
SLC38A5	92745	Xp11.23	0.341968	4.28549e-16	2.31347e-14
ATP8B3	148229	19p13.3	0.341821	4.41882e-16	2.37904e-14
GAS7	8522	17p13.1	0.341685	4.54575e-16	2.44081e-14
TCHH	7062	1q21.3	0.341543	4.68293e-16	2.50106e-14
NCF1C	654817	7q11.23	0.341523	4.7026e-16	2.50488e-14
PDCD1	5133	2q37.3	0.341451	4.77314e-16	2.53572e-14
PARP14	54625	3q21.1	0.341246	4.98186e-16	2.63263e-14
RFFL	117584	17q12	0.341131	5.10218e-16	2.68912e-14
OSBPL3	26031	7p15.3	0.341033	5.20729e-16	2.73731e-14
KIAA0930	23313	22q13.31	0.34102	5.22175e-16	2.73773e-14
MOCOS	55034	18q12.2	0.34095	5.29882e-16	2.77088e-14
PRKCB	5579	16p12.2-p12.1	0.340802	5.46429e-16	2.84997e-14
LCP2	3937	5q35.1	0.340172	6.2276e-16	3.23965e-14
DLEU7	220107	13q14.3	0.340144	6.265e-16	3.24495e-14
ACAP1	9744	17p13.1	0.34014	6.27021e-16	3.24495e-14
THEMIS	387357	6q22.33	0.340022	6.42547e-16	3.31674e-14
CABLES2	81928	20q13.33	0.339993	6.46335e-16	3.32771e-14
MMD	23531	17q22	0.339636	6.96056e-16	3.56537e-14
CHEK2	11200	22q12.1	0.339427	7.26774e-16	3.70377e-14
FCGR2A	2212	1q23.3	0.339265	7.51475e-16	3.81993e-14
CD200R1	131450	3q13.2	0.339187	7.63809e-16	3.8728e-14
TP53INP1	94241	8q22.1	0.339124	7.73855e-16	3.91383e-14
OPRL1	4987	20q13.33	0.338787	8.29498e-16	4.16851e-14
ACRBP	84519	12p13.31	0.338782	8.30455e-16	4.16851e-14
SYT6	148281	1p13.2	0.338724	8.40392e-16	4.20784e-14
SIT1	27240	9p13.3	0.338615	8.59594e-16	4.29325e-14
STAT5A	6776	17q21.2	0.338567	8.68133e-16	4.31439e-14
DNASE2	1777	19p13.13	0.33848	8.83781e-16	4.38128e-14
CD74	972	5q33.1	0.338404	8.97764e-16	4.43961e-14
JAK3	3718	19p13.11	0.338372	9.03662e-16	4.45777e-14
CD180	4064	5q12.3	0.338339	9.09982e-16	4.47791e-14
CFAP47	286464	Xp21.1	0.338267	9.23516e-16	4.53338e-14
P2RY6	5031	11q13.4	0.337943	9.8714e-16	4.83385e-14
PLEKHA8P1	51054	12q12	0.337714	1.03494e-15	5.05554e-14
NCF4	4689	22q12.3	0.337558	1.06849e-15	5.20673e-14
NLRC4	58484	2p22.3	0.337509	1.07933e-15	5.2468e-14
ATP1A3	478	19q13.2	0.33746	1.09026e-15	5.28711e-14
TMC8	147138	17q25.3	0.337033	1.19012e-15	5.72974e-14
CARMIL2	146206	16q22.1	0.336667	1.28304e-15	6.14755e-14
LST1	7940	6p21.33	0.336606	1.29903e-15	6.20931e-14
IL23A	51561	12q13.3	0.336405	1.35357e-15	6.4546e-14
CD3D	915	11q23.3	0.336156	1.42434e-15	6.77232e-14
MNDA	4332	1q23.1	0.336147	1.42696e-15	6.77232e-14
ADA2	51816	22q11.1	0.335939	1.48912e-15	7.04244e-14
LITAF	9516	16p13.13	0.335933	1.49091e-15	7.04244e-14
LY9	4063	1q23.3	0.33589	1.50416e-15	7.08832e-14
MIR155HG	114614	21q21.3	0.335873	1.5094e-15	7.0963e-14
GPSM2	29899	1p13.3	0.335751	1.54724e-15	7.25719e-14
SLAMF6	114836	1q23.2-q23.3	0.33572	1.55725e-15	7.28705e-14
GPR55	9290	2q37.1	0.335592	1.59825e-15	7.4615e-14
GLIPR1	11010	12q21.2	0.335383	1.66812e-15	7.76956e-14
CCDC42	146849	17p13.1	0.33528	1.70328e-15	7.91492e-14
MGME1	92667	20p11.23	0.334644	1.93887e-15	8.98884e-14
KLHDC7B	113730	22q13.33	0.33453	1.98432e-15	9.17198e-14
PKIB	5570	6q22.31	0.334522	1.98754e-15	9.17198e-14
TOX	9760	8q12.1	0.334206	2.11923e-15	9.73484e-14
PARN	5073	16p13.12	0.33414	2.14807e-15	9.84477e-14
CD3E	916	11q23.3	0.333598	2.39736e-15	1.09124e-13
SPINK13	153218	5q32	0.333386	2.50271e-15	1.13403e-13
APOL6	80830	22q12.3	0.333276	2.559e-15	1.15692e-13
DOP1B	9980	21q22.12	0.333253	2.5709e-15	1.15969e-13
C1ORF127	148345	1p36.22	0.333102	2.6507e-15	1.19299e-13
GRIN3A	116443	9q31.1	0.333011	2.70013e-15	1.2098e-13
C1R	715	12p13.31	0.332689	2.88174e-15	1.28829e-13
TNFSF4	7292	1q25.1	0.33247	3.0116e-15	1.34036e-13
ETV7	51513	6p21.31	0.332415	3.0452e-15	1.35231e-13
MARCHF1	55016	4q32.2-q32.3	0.332225	3.1643e-15	1.40209e-13
NCF1B	654816	7q11.23	0.3321	3.2449e-15	1.43463e-13
C10ORF88B	399815	10q26.13	0.332029	3.29192e-15	1.44903e-13
MYO1G	64005	7p13	0.331648	3.55419e-15	1.55762e-13
MS4A7	58475	11q12.2	0.331594	3.59316e-15	1.57126e-13
ADORA3	140	1p13.2	0.331555	3.6214e-15	1.58016e-13
CXCR3	2833	Xq13.1	0.33147	3.6837e-15	1.60385e-13
CD300C	10871	17q25.1	0.331021	4.03118e-15	1.74754e-13
PSTPIP1	9051	15q24.3	0.330892	4.13702e-15	1.78955e-13
CD4	920	12p13.31	0.330787	4.22551e-15	1.82389e-13
HCST	10870	19q13.12	0.330685	4.31285e-15	1.85759e-13
RNASE6	6039	14q11.2	0.330245	4.70934e-15	2.01106e-13
CCNE1	898	19q12	0.329862	5.08487e-15	2.15942e-13
HEXA-AS1	80072	15q23	0.329858	5.0891e-15	2.15942e-13
CCL3	6348	17q12	0.329744	5.20615e-15	2.20441e-13
FGD3	89846	9q22.31	0.32973	5.221e-15	2.20604e-13
HPS5	11234	11p15.1	0.32968	5.27345e-15	2.21884e-13
GCNT1	2650	9q21.13	0.329625	5.33169e-15	2.23864e-13
KIF18A	81930	11p14.1	0.329571	5.38925e-15	2.25807e-13
SMTNL1	219537	11q12.1	0.329342	5.64123e-15	2.35872e-13
P2RY10	27334	Xq21.1	0.329168	5.83986e-15	2.42991e-13
OSCAR	126014	19q13.42	0.329161	5.8479e-15	2.42991e-13
PMAIP1	5366	18q21.32	0.329072	5.9528e-15	2.46328e-13
TTC24	164118	1q22	0.329051	5.97788e-15	2.46856e-13
TIFAB	497189	5q31.1	0.328859	6.21109e-15	2.55958e-13
SAA1	6288	11p15.1	0.328836	6.2398e-15	2.56613e-13
KBTBD8	84541	3p14.1	0.328795	6.29048e-15	2.58167e-13
NRDC	4898	1p32.3	0.328681	6.43433e-15	2.63531e-13
DAPP1	27071	4q23	0.328451	6.73588e-15	2.75319e-13
TACC3	10460	4p16.3	0.328424	6.77291e-15	2.76269e-13
TNFRSF9	3604	1p36.23	0.328218	7.05576e-15	2.87221e-13
LHFPL5	222662	6p21.31	0.327952	7.43825e-15	3.00956e-13
BTBD11	121551	12q23.3	0.327811	7.64874e-15	3.07608e-13
SIRPD	128646	20p13	0.32767	7.86605e-15	3.15714e-13
SLC46A3	283537	13q12.3	0.327622	7.94134e-15	3.17463e-13
SLC4A5	57835	2p13.1	0.327464	8.19378e-15	3.26902e-13
CXCR2P1	3580	2q35	0.327448	8.22017e-15	3.27303e-13
CD28	940	2q33.2	0.327331	8.41177e-15	3.33606e-13
TMEM150B	284417	19q13.42	0.327227	8.58654e-15	3.39864e-13
TOR3A	64222	1q25.2	0.327159	8.70416e-15	3.4384e-13
PPP1R1A	5502	12q13.2	0.327126	8.75983e-15	3.44794e-13
HMGA1	3159	6p21.31	0.327115	8.77995e-15	3.44794e-13
CELF2	10659	10p14	0.326893	9.17369e-15	3.58849e-13
CD244	51744	1q23.3	0.326828	9.29321e-15	3.62815e-13
ADAM28	10863	8p21.2	0.326513	9.88896e-15	3.84575e-13
TLR7	51284	Xp22.2	0.3264	1.01128e-14	3.90248e-13
SAA2	6289	11p15.1	0.326148	1.06267e-14	4.08507e-13
LILRB2	10288	19q13.4	0.326125	1.06763e-14	4.09625e-13
AOAH	313	7p14.2	0.325825	1.13251e-14	4.3286e-13
ENTHD1	150350	22q13.1	0.325662	1.16937e-14	4.46098e-13
SLC17A9	63910	20q13.33	0.325558	1.19364e-14	4.53629e-13
DNER	92737	2q36.3	0.325301	1.25541e-14	4.75299e-13
TEX19	400629	17q25.3	0.32509	1.3086e-14	4.91718e-13
PLB1	151056	2p23.2	0.325061	1.31597e-14	4.92642e-13
LCK	3932	1p35.2	0.325049	1.31928e-14	4.92957e-13
PYHIN1	149628	1q23.1	0.325022	1.32629e-14	4.94655e-13
GPR68	8111	14q32.11	0.325003	1.33129e-14	4.95597e-13
WDFY4	57705	10q11.23	0.324873	1.36545e-14	5.07369e-13
PARP15	165631	3q21.1	0.324848	1.37242e-14	5.09015e-13
SLC25A53	401612	Xq22.2	0.324506	1.46753e-14	5.4228e-13
ARPC3	10094	12q24.11	0.323984	1.62524e-14	5.97252e-13
KRT36	8689	17q21.2	0.323344	1.84167e-14	6.71856e-13
NPL	80896	1q25.3	0.323263	1.87095e-14	6.80061e-13
PARPBP	55010	12q23.2	0.323214	1.88906e-14	6.85401e-13
NINJ2	4815	12p13.33	0.323041	1.95379e-14	7.06326e-13
TBC1D10C	374403	11q13.2	0.322974	1.97933e-14	7.14272e-13
PSTPIP2	9050	18q21.1	0.322833	2.03475e-14	7.3295e-13
SNX10	29887	7p15.2	0.322756	2.0652e-14	7.42582e-13
SYNGR3	9143	16p13.3	0.322727	2.07715e-14	7.45539e-13
NAPSB	256236	19q13.33	0.322715	2.08206e-14	7.45965e-13
SDS	10993	12q24.13	0.322395	2.21552e-14	7.90953e-13
PLA2G15	23659	16q22.1	0.321588	2.59125e-14	9.153e-13
CLIP4	79745	2p23.2	0.321481	2.64565e-14	9.32872e-13
HLA-DPA1	3113	6p21.32	0.321436	2.6687e-14	9.39343e-13
GZMA	3001	5q11.2	0.321351	2.71305e-14	9.53281e-13
TMEM121B	27439	22q11.1	0.321259	2.76188e-14	9.65607e-13
GOLGA8CP	729786	15q11.2	0.321147	2.82259e-14	9.83144e-13
PYCARD	29108	16p11.2	0.320965	2.92333e-14	1.01647e-12
STK26	51765	Xq26.2	0.320849	2.98972e-14	1.03595e-12
PRAME	23532	22q11.22	0.320698	3.07817e-14	1.06109e-12
POLQ	10721	3q13.33	0.320684	3.0869e-14	1.06227e-12
HLA-DRA	3122	6p21.32	0.320434	3.23947e-14	1.11287e-12
GPSM3	63940	6p21.32	0.320411	3.25349e-14	1.11577e-12
CASP5	838	11q22.3	0.320302	3.32314e-14	1.13771e-12
MARS1	4141	12q13.3	0.320046	3.49125e-14	1.19119e-12
CTSZ	1522	20q13.32	0.319969	3.54305e-14	1.20681e-12
SLFN12L	100506736	17q12	0.319812	3.65194e-14	1.24178e-12
ADAMDEC1	27299	8p21.2	0.319801	3.66001e-14	1.24242e-12
ITGAM	3684	16p11.2	0.319653	3.76521e-14	1.27381e-12
CD14	929	5q31.3	0.319605	3.80078e-14	1.28295e-12
MYCL	4610	1p34.2	0.319599	3.80505e-14	1.28295e-12
CMTM7	112616	3p22.3	0.319506	3.87372e-14	1.30391e-12
HTATIP2	10553	11p15.1	0.319019	4.25354e-14	1.42458e-12
CAPZA1	829	1p13.2	0.318464	4.73113e-14	1.57925e-12
DNAH3	55567	16p12.3	0.318132	5.04168e-14	1.68011e-12
SIGLEC1	6614	20p13	0.31782	5.35133e-14	1.77856e-12
C1QL1	10882	17q21.31	0.317817	5.35487e-14	1.77856e-12
TNS4	84951	17q21.2	0.317808	5.36441e-14	1.77878e-12
ADAM8	101	10q26.3	0.317454	5.73918e-14	1.89677e-12
FGD2	221472	6p21.2	0.31742	5.77685e-14	1.90608e-12
MSR1	4481	8p22	0.317328	5.87885e-14	1.93654e-12
HLA-DMA	3108	6p21.32	0.317244	5.97371e-14	1.96456e-12
SIGLEC7	27036	19q13.41	0.316832	6.46219e-14	2.12172e-12
CASP4	837	11q22.3	0.316735	6.58254e-14	2.1577e-12
TTPAL	79183	20q13.12	0.316605	6.74725e-14	2.20447e-12
PTTG1	9232	5q33.3	0.316595	6.76041e-14	2.20517e-12
CD8A	925	2p11.2	0.316517	6.86087e-14	2.2343e-12
INSL3	3640	19p13.11	0.316387	7.03208e-14	2.28634e-12
EDEM2	55741	20q11.22	0.316166	7.33473e-14	2.37318e-12
RFC4	5984	3q27.3	0.316076	7.46059e-14	2.41001e-12
LAX1	54900	1q32.1	0.316029	7.5273e-14	2.42765e-12
NCF2	4688	1q25.3	0.315991	7.58178e-14	2.44129e-12
FAT2	2196	5q33.1	0.315963	7.62162e-14	2.45017e-12
TMEM154	201799	4q31.3	0.315762	7.91823e-14	2.53333e-12
IFI16	3428	1q23.1	0.315641	8.1017e-14	2.58377e-12
STX11	8676	6q24.2	0.315276	8.682e-14	2.75567e-12
FANCD2	2177	3p25.3	0.315107	8.96408e-14	2.84071e-12
JPT1	51155	17q25.1	0.31472	9.64508e-14	3.04687e-12
GZMK	3003	5q11.2	0.314642	9.78869e-14	3.08737e-12
SLCO5A1	81796	8q13.3	0.314613	9.84132e-14	3.09909e-12
TLR8	51311	Xp22.2	0.31455	9.95992e-14	3.13151e-12
MCUB	55013	4q25	0.314375	1.0294e-13	3.20636e-12
GCH1	2643	14q22.2	0.314279	1.04829e-13	3.25578e-12
IQSEC2	23096	Xp11.22	0.314277	1.04852e-13	3.25578e-12
LRFN1	57622	19q13.2	0.31424	1.056e-13	3.27391e-12
CD5	921	11q12.2	0.31401	1.10272e-13	3.40298e-12
PARP12	64761	7q34	0.313935	1.11849e-13	3.44631e-12
TNFRSF17	608	16p13.13	0.313924	1.12068e-13	3.44778e-12
UBE2F	140739	2q37.3	0.313539	1.20489e-13	3.68983e-12
SLC37A2	219855	11q24.2	0.313409	1.23477e-13	3.77557e-12
PSME2	5721	14q12	0.313375	1.24263e-13	3.7899e-12
NRBF2	29982	10q21.3	0.313373	1.24324e-13	3.7899e-12
TM6SF1	53346	15q25.2	0.313279	1.26544e-13	3.84003e-12
AURKA	6790	20q13.2	0.313254	1.2712e-13	3.84925e-12
LINC00475	158314	9q22.31	0.313244	1.27368e-13	3.84925e-12
HECTD2-AS1	100188947	10q23.32	0.313242	1.27424e-13	3.84925e-12
DENND2D	79961	1p13.3-p13.2	0.312773	1.39146e-13	4.18441e-12
GPR132	29933	14q32.33	0.31264	1.42656e-13	4.2771e-12
NCAPH	23397	2q11.2	0.312626	1.43019e-13	4.2816e-12
WNT10A	80326	2q35	0.312197	1.54977e-13	4.61202e-12
DGKG	1608	3q27.2-q27.3	0.31171	1.69771e-13	5.03728e-12
NUP37	79023	12q23.2	0.311694	1.70263e-13	5.04443e-12
CKLF	51192	16q21	0.311676	1.70843e-13	5.05414e-12
TMEM268	203197	9q32	0.311364	1.81079e-13	5.31766e-12
OTULINL	54491	5p15.2	0.31124	1.85324e-13	5.43437e-12
ITK	3702	5q33.3	0.311156	1.88235e-13	5.51167e-12
ELF4	2000	Xq26.1	0.31095	1.95626e-13	5.7197e-12
CYBB	1536	Xp21.1-p11.4	0.310904	1.97284e-13	5.75138e-12
DPP9	91039	19p13.3	0.310867	1.98666e-13	5.78327e-12
TESPA1	9840	12q13.2	0.310727	2.03915e-13	5.92745e-12
GAPT	202309	5q11.2	0.310619	2.08062e-13	6.03172e-12
RGS18	64407	1q31.2	0.310617	2.08105e-13	6.03172e-12
PVRIG	79037	7q22.1	0.310593	2.09055e-13	6.05052e-12
CD6	923	11q12.2	0.310322	2.19857e-13	6.32573e-12
IL2RB	3560	22q12.3	0.310315	2.20144e-13	6.32573e-12
CLEC12A	160364	12p13.31	0.310167	2.26282e-13	6.4928e-12
IL10	3586	1q32.1	0.31013	2.27836e-13	6.52805e-12
ZNF80	7634	3q13.31	0.309974	2.34546e-13	6.68206e-12
BET1	10282	7q21.3	0.309871	2.39053e-13	6.80077e-12
KCNN4	3783	19q13.31	0.309603	2.51246e-13	7.12741e-12
FCRL5	83416	1q23.1	0.309593	2.51681e-13	7.12967e-12
RNASEH2B	79621	13q14.3	0.309394	2.6116e-13	7.38774e-12
FCGR2B	2213	1q23.3	0.309385	2.61599e-13	7.38971e-12
ALPK1	80216	4q25	0.309287	2.66374e-13	7.51399e-12
PSMD7	5713	16q23.1	0.308557	3.0485e-13	8.5392e-12
CEBPA-DT	80054	19q13.11	0.308471	3.09717e-13	8.66342e-12
CSF1R	1436	5q32	0.308126	3.30027e-13	9.20583e-12
SEPTIN1	1731	16p11.2	0.308084	3.32625e-13	9.26539e-12
GOLGA7B	401647	10q24.2	0.308002	3.37674e-13	9.36696e-12
M6PR	4074	12p13.31	0.307771	3.52321e-13	9.74625e-12
ITIH4	3700	3p21.1	0.307734	3.54778e-13	9.80069e-12
GPR141	353345	7p14.1	0.30759	3.64282e-13	1.00397e-11
F2	2147	11p11.2	0.307256	3.87326e-13	1.06265e-11
PSMC2	5701	7q22.1	0.307217	3.90138e-13	1.0689e-11
CRYBG2	55057	1p36.11	0.307072	4.00662e-13	1.09474e-11
PSMB10	5699	16q22.1	0.306954	4.09404e-13	1.11689e-11
APOC1P1	342	19q13.32	0.306948	4.09882e-13	1.11689e-11
CKM	1158	19q13.32	0.306791	4.21859e-13	1.1458e-11
TNFRSF18	8784	1p36.33	0.306782	4.22546e-13	1.1458e-11
RCN1	5954	11p13	0.306634	4.34116e-13	1.17493e-11
ZBBX	79740	3q26.1	0.306605	4.36452e-13	1.17966e-11
FAM218A	152756	4q32.3	0.306596	4.3721e-13	1.18011e-11
IL1RN	3557	2q14.1	0.306476	4.46858e-13	1.20453e-11
VSIG4	11326	Xq12	0.306442	4.49708e-13	1.21058e-11
GRAMD1B	57476	11q24.1	0.30643	4.50704e-13	1.21164e-11
STAT4	6775	2q32.2-q32.3	0.306332	4.58835e-13	1.23184e-11
TBK1	29110	12q14.2	0.306309	4.60731e-13	1.23363e-11
IL15RA	3601	10p15.1	0.306281	4.63145e-13	1.23694e-11
CCL5	6352	17q12	0.30628	4.63202e-13	1.23694e-11
FTL	2512	19q13.33	0.306171	4.72563e-13	1.25858e-11
TNFAIP8	25816	5q23.1	0.306113	4.77587e-13	1.27027e-11
MCTS1	28985	Xq24	0.306038	4.84134e-13	1.28597e-11
GRB2	2885	17q25.1	0.305972	4.90055e-13	1.29998e-11
KLHL6	89857	3q27.1	0.305906	4.9604e-13	1.31411e-11
ACTBL2	345651	5q11.2	0.305883	4.98103e-13	1.31783e-11
FKBP11	51303	12q13.12	0.305839	5.02089e-13	1.32663e-11
RAD51AP1	10635	12p13.32	0.305735	5.11725e-13	1.35031e-11
ERMN	57471	2q24.1	0.30571	5.14038e-13	1.35439e-11
FCGR2C	9103	1q23.3	0.305704	5.14627e-13	1.35439e-11
HCLS1	3059	3q13.33	0.305503	5.33895e-13	1.40326e-11
CD3G	917	11q23.3	0.305375	5.465e-13	1.43451e-11
VSIG10L	147645	19q13.41	0.305091	5.75464e-13	1.50659e-11
C5ORF58	133874	5q35.1	0.305036	5.81337e-13	1.51998e-11
EOMES	8320	3p24.1	0.304838	6.02627e-13	1.57348e-11
SLA	6503	8q24.22	0.304831	6.0337e-13	1.57348e-11
EPB41	2035	1p35.3	0.304797	6.07128e-13	1.58122e-11
MZB1	51237	5q31.2	0.304595	6.29794e-13	1.63812e-11
LMNB1	4001	5q23.2	0.304397	6.52938e-13	1.69173e-11
GAL3ST4	79690	7q22.1	0.304282	6.66677e-13	1.72286e-11
H2BC18	440689	1q21.2	0.304103	6.88697e-13	1.77748e-11
FAM72B	653820	1p11.2	0.304082	6.91281e-13	1.78185e-11
C7ORF31	136895	7p15.3	0.30382	7.24961e-13	1.86626e-11
CCL4L1	388372	17q12 alternate reference locus	0.303628	7.50705e-13	1.92511e-11
NMI	9111	2q23.3	0.303619	7.51841e-13	1.92543e-11
C16ORF54	283897	16p11.2	0.303612	7.52754e-13	1.92543e-11
ZNF683	257101	1p36.11	0.303398	7.82525e-13	1.99395e-11
SIGLEC11	114132	19q13.33	0.303318	7.93961e-13	2.02052e-11
ICAM3	3385	19p13.2	0.303202	8.10775e-13	2.06068e-11
ADGRG5	221188	16q21	0.303118	8.23182e-13	2.08957e-11
SLC1A3	6507	5p13.2	0.302998	8.41243e-13	2.13271e-11
DCANP1	140947	5q31.1	0.302781	8.74942e-13	2.21254e-11
TRPC2	7221	11p15.4	0.302602	9.03555e-13	2.28202e-11
DUSP10	11221	1q41	0.302541	9.13625e-13	2.30454e-11
AMPD3	272	11p15.4	0.302415	9.34535e-13	2.35137e-11
TARBP2	6895	12q13.13	0.302337	9.47809e-13	2.38177e-11
HOXB13	10481	17q21.32	0.302276	9.58245e-13	2.40498e-11
CYBC1	79415	17q25.3	0.302223	9.6747e-13	2.41904e-11
VXN	254778	8q13.1	0.302008	1.00565e-12	2.51137e-11
ASNS	440	7q21.3	0.301995	1.00795e-12	2.51398e-11
CCDC112	153733	5q22.3	0.301956	1.01515e-12	2.52879e-11
S100Z	170591	5q13.3	0.301803	1.04347e-12	2.59288e-11
CARD17	440068	11q22.3	0.301697	1.06352e-12	2.63617e-11
LGALS9	3965	17q11.2	0.301347	1.1325e-12	2.79676e-11
RAP2B	5912	3q25.2	0.301287	1.14486e-12	2.82379e-11
CARD14	79092	17q25.3	0.301205	1.16182e-12	2.8621e-11
NPC2	10577	14q24.3	0.301161	1.17099e-12	2.88115e-11
IRF1	3659	5q31.1	0.301026	1.19979e-12	2.94838e-11
MR1	3140	1q25.3	0.300967	1.21239e-12	2.97233e-11
SEMA4A	64218	1q22	0.300854	1.23727e-12	3.02565e-11
DOK1	1796	2p13.1	0.300785	1.25265e-12	3.05952e-11
PIK3CD-AS1	644997	1p36.22	0.300679	1.27662e-12	3.11048e-11
RPL13P5	283345	12p13.31	0.300597	1.29555e-12	3.15277e-11
GSAP	54103	7q11.23	0.300413	1.33899e-12	3.25058e-11
CACNA2D4	93589	12p13.33	0.300405	1.34078e-12	3.25099e-11
CASS4	57091	20q13.31	0.300379	1.34705e-12	3.26225e-11
HSPA6	3310	1q23.3	0.300371	1.34907e-12	3.26318e-11
PBX3	5090	9q33.3	0.30035	1.35415e-12	3.27153e-11
SELL	6402	1q24.2	0.300334	1.35796e-12	3.27677e-11

## Sheet: Table S3
Table S3. The correlation between the ST3GAL5 protein expression, the density of CD8+ or PD-1+ cells and clinicopathological parameters of 45 ccRCC samples from our IHC cohort
Clinical parameter	n	Expression of ST3GAL5		p	Density of CD8+ cells		p	Density of PD-1+ cells		p
		Low (n,%)	High (n,%)		Low (n,%)	High (n,%)		Low (n,%)	High (n,%)
Gender				0.0446			0.0789			0.0233
Male	28	8(28.6%)	20(71.4%)		9(32.1%)	19(67.9%)		10(35.7%)	18(64.3%)
Female	17	10(58.8%)	7(41.2%)		10(58.8%)	7(41.2%)		12(70.6%)	5(29.4%)
Age				0.1674			0.0789			0.6718
＜65	28	9(32.1%)	19(67.9%)		9(32.1%)	19(67.9%)		13(46.4%)	15(53.6%)
≥65	17	9(52.9%)	8(47.1%)		10(64.7%)	7(35.3%)		9(52.9%)	8(47.1%)
Stage				0.0183			0.0362			0.0106
I	18	11(61.1)	7(38.9%)		11(61.1%)	7(38.9%)		13(72.2%)	5(27.8%)
II-III	27	7(25.9%)	20(74.1%)		8(29.6%)	19(70.4%)		9(33.3%)	18(66.7%)
Grade				0.4376			>0.9999			>0.9999
G1	7	4(57.1%)	3(42.9%)		3(42.9%)	4(57.1%)		4(57.1%)	3(42.9%)
G2-G3	35	14(40%)	21(60%)		16(45.7%)	19(54.3%)		18(51.4%)	17(48.6%)
Unknown	3
Abbreviations: ST3GAL5, ST3 β-galactoside α-2,3-sialyltransferase 5
